# Supplementary material
Source: PubMed Central journal article supplement (PMC7318916)
Supplement: NIHMS1524200-supplement-10.pdf [file NIHMS1524200-supplement-10.pdf]

**Supplementary Table 1:** Spearman Rho Correlations between the Mullen Scales of Early Learning Domains and Diffusion Tensor Imaging Scalars in other Regions of Interest (N = 14)

| ROIs                 | MSEL GM       |               | MSEL FM |      | MSEL VR |      | MSEL RL |      | MSEL EL |      | MSEL Composite |      |
|----------------------|---------------|---------------|---------|------|---------|------|---------|------|---------|------|----------------|------|
|                      | rho           | sig.          | rho     | sig. | rho     | sig. | rho     | sig. | rho     | sig. | rho            | sig. |
| <b>Genu CC FA</b>    | <b>0.523</b>  | <b>0.06</b>   | 0.047   | 0.87 | 0.298   | 0.30 | -0.161  | 0.58 | -0.010  | 0.97 | 0.112          | 0.70 |
| <b>Genu CC MD</b>    | <b>-0.717</b> | <b>0.00**</b> | -0.167  | 0.57 | -0.156  | 0.59 | 0.095   | 0.75 | 0.033   | 0.91 | -0.092         | 0.75 |
| <b>Genu CC AD</b>    | 0.092         | 0.75          | -0.033  | 0.91 | 0.209   | 0.47 | 0.165   | 0.57 | 0.164   | 0.58 | 0.150          | 0.61 |
| <b>Genu CC RD</b>    | <b>-0.605</b> | <b>0.22*</b>  | -0.046  | 0.88 | -2.180  | 0.45 | 0.152   | 0.60 | 0.099   | 0.74 | -0.018         | 0.95 |
| <b>Right PLIC FA</b> | 0.191         | 0.51          | -0.176  | 0.55 | -0.093  | 0.75 | 0.099   | 0.74 | -0.290  | 0.32 | -0.180         | 0.54 |
| <b>Right PLIC MD</b> | <b>-0.629</b> | <b>0.02*</b>  | 0.139   | 0.64 | -0.024  | 0.93 | 0.108   | 0.71 | 0.190   | 0.52 | 0.123          | 0.68 |
| <b>Right PLIC AD</b> | -0.517        | 0.06*         | -0.370  | 0.19 | -0.350  | 0.22 | 0.183   | 0.53 | -0.338  | 0.24 | -0.310         | 0.28 |
| <b>Right PLIC RD</b> | -0.471        | 0.09          | 0.145   | 0.62 | 0.026   | 0.93 | 0.018   | 0.95 | 0.256   | 0.38 | 0.161          | 0.58 |
| <b>Left PLIC FA</b>  | 0.191         | 0.51          | -0.176  | 0.55 | -0.093  | 0.75 | 0.099   | 0.74 | -0.290  | 0.32 | -0.180         | 0.54 |
| <b>Left PLIC MD</b>  | <b>-0.629</b> | <b>0.02*</b>  | 0.139   | 0.64 | -0.024  | 0.93 | 0.108   | 0.71 | 0.190   | 0.52 | 0.123          | 0.68 |
| <b>Left PLIC AD</b>  | <b>-0.517</b> | 0.06          | -0.370  | 0.19 | -0.350  | 0.22 | 0.183   | 0.53 | -0.338  | 0.24 | -0.310         | 0.28 |
| <b>Left PLIC RD</b>  | <b>-0.471</b> | 0.09          | 0.145   | 0.62 | 0.026   | 0.93 | 0.018   | 0.95 | 0.256   | 0.38 | 0.161          | 0.58 |
| <b>Thalamus FA</b>   | -0.009        | 0.98          | -0.112  | 0.70 | 0.112   | 0.70 | -0.104  | 0.72 | -0.064  | 0.83 | -0.077         | 0.79 |
| <b>Thalamus MD</b>   | <b>-0.572</b> | <b>0.03*</b>  | 0.150   | 0.61 | 0.073   | 0.81 | 0.309   | 0.28 | 0.343   | 0.23 | 0.246          | 0.40 |
| <b>Thalamus AD</b>   | <b>-0.638</b> | <b>0.01**</b> | 0.066   | 0.82 | 0.115   | 0.70 | 0.501   | 0.07 | 0.358   | 0.21 | 0.246          | 0.40 |
| <b>Thalamus RD</b>   | -0.506        | 0.07          | 0.189   | 0.52 | 0.079   | 0.79 | 0.311   | 0.28 | 0.329   | 0.25 | 0.253          | 0.38 |

Note: CC = corpus callosum; PLIC = Posterior Limb of the Internal Capsule; FA = fractional anisotropy; MD = mean diffusivity; AD = axial diffusivity; RD = radial diffusivity; MSEL = Mullen Scales of Early Learning; GM = Gross Motor; FM = Fine Motor; VR = Visual Reception; RL = Receptive Language; EL = Expressive Language; \*p ≤ .05; \*\*p ≤ .01
